# Supplementary material for: Continuous liquid-phase synthesis of nickel phosphide nanoparticles in a helically coiled tube reactor
Source: Royal Society of Chemistry journal article supplement (doi:10.1039/d0re00010h), 2020-01-01
Supplement: d0re00010h1.pdf [file d0re00010h1.pdf]

Electronic Supplementary Information (ESI)

for

**Continuous liquid-phase synthesis of nickel phosphide  
nanoparticles in a slug-flow microreactor**

Huidong Zheng,<sup>\*a</sup> Donglin Li,<sup>a</sup> Jingjing Chen,<sup>a</sup> Jie Liu,<sup>a</sup> Zuoyi Yan,<sup>a</sup> and

S. Ted Oyama<sup>\*a,b,c</sup>

<sup>a</sup> College of Chemical Engineering, Fuzhou University, Xueyuan Road No. 2, Minhou, Fuzhou, Fujian 350108, China

<sup>b</sup> Department of Chemical System Engineering, The University of Tokyo, 7-3-1 Hongo, Bunkyo-ku, Tokyo 113-8656, Japan

<sup>c</sup> Department of Chemical Engineering, Virginia Tech, Blacksburg, Virginia, 24060, USA

<sup>\*</sup> To whom correspondence should be addressed.

E-mail: youngman@fzu.edu.cn; oyama@vt.edu

---

## 1. Calculations on continuous preparation of nanoparticles:

(1)

The concentrations of each component are calculated by following Equation:

$$C_i = \frac{n_i}{V_{\text{total}}} = \frac{n_i}{\frac{n_{\text{TOP}} M_{\text{TOP}}}{\rho_{\text{TOP}}} + \frac{n_{\text{1-oct}} M_{\text{1-oct}}}{\rho_{\text{1-oct}}}}, \quad i = \text{Ni, TOP, 1-oct} \quad (\text{S1-1})$$

(2)

Taking the thermal expansion of the flow into account, the residence time  $\tau$  can be calculated as following Equation:

$$\tau = \frac{V_{\text{tube}}}{F} = \frac{\pi d^2 l / 4}{L[1 + \alpha(T - T_0)]} \quad (\text{for single-phase process}) \quad (\text{S2-1})$$

$$\text{or } \tau = \frac{V_{\text{tube}}}{F} = \frac{\pi d^2 l / 4}{G[(T + 273)/(T_0 + 273)] + L[1 + \alpha(T - T_0)]} \quad (\text{for two-phase process}) \quad (\text{S2-2})$$

where  $F$  is actual flow rate at reaction temperature,  $l$  is the tube length,  $G$  and  $L$  are gas and liquid flow rates at room temperature respectively,  $T$  and  $T_0$  are the reaction temperature and room temperature respectively,  $\alpha$  is the thermal expansion coefficient of the liquid, typically  $\alpha = 0.0007 \text{ K}^{-1}$  for long chain paraffins (taking 1-octadecene to be a paraffin).

(3)

The product yield was calculated by the following Equation:

$$Y = \frac{n_{\text{Ni}_2\text{P}}}{n_{\text{T}}} \times 100\% = \frac{m/M_{\text{Ni}_2\text{P}}}{n_{\text{Ni}}/2} \times 100\% \quad (\text{S2-3})$$

where  $Y$  is the yield of  $\text{Ni}_2\text{P}$ ,  $n_{\text{Ni}_2\text{P}}$  and  $n_{\text{T}}$  are actual and theoretical mole product of  $\text{Ni}_2\text{P}$  respectively,  $m$  is the collected amount of  $\text{Ni}_2\text{P}$ ,  $M_{\text{Ni}_2\text{P}}$  is the molecular weight of  $\text{Ni}_2\text{P}$ , and  $n_{\text{Ni}}$  is the mole of  $\text{Ni}(\text{acac})_2$  feed.

## 2. Particle size distribution and SEM images:

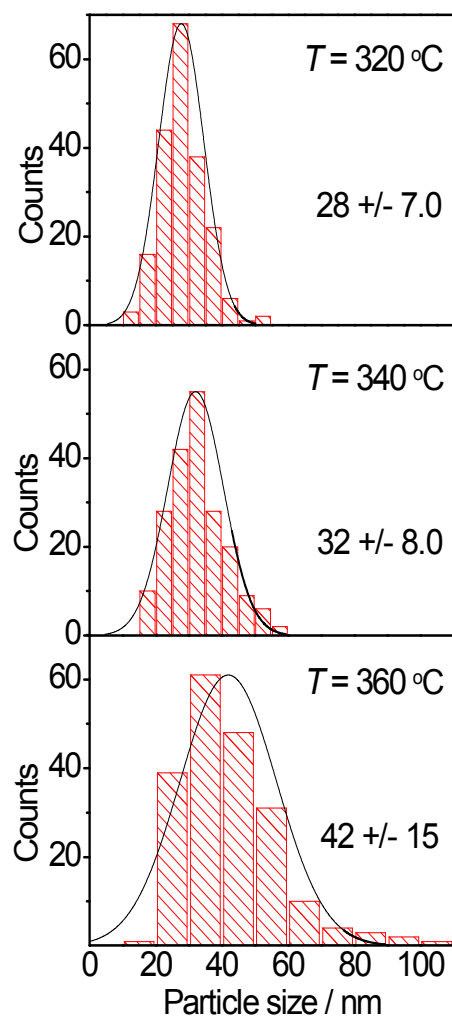

**Figure S3.** Particle size distributions of  $\text{Ni}_2\text{P}$  nanoparticles synthesized at 320, 340, and 360 °C;  $\tau = 170$  s;  $C_{\text{Ni}} = 0.05$  M;  $C_{\text{TOP}} = 0.80$  M;  $C_{1\text{-oct}} = 1.70$  M;  $n = 100$ .

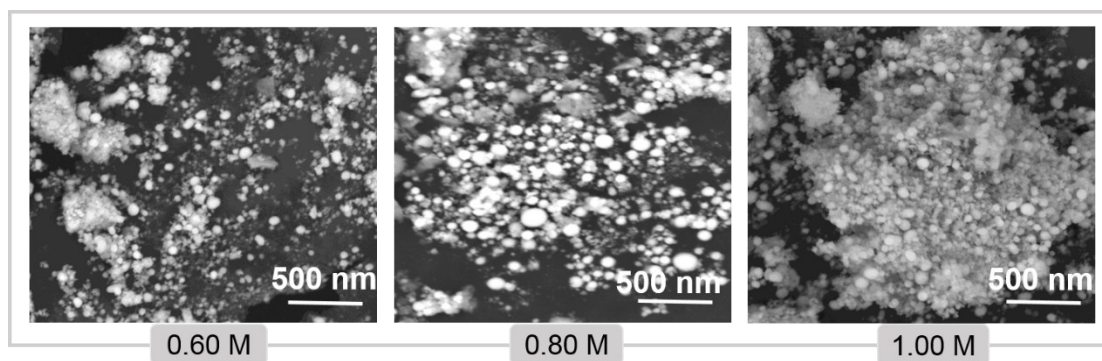

**Figure S4.** SEM micrographs of  $\text{Ni}_2\text{P}$  nanoparticles synthesized with TOP concentrations of 0.60, 0.80 and 1.00 M;  $T = 360\text{ }^\circ\text{C}$ ;  $L = 1.0\text{ mL/min}$ ;  $\tau = 170\text{ s}$ ;  $\text{P/Ni} = 16.0$ ;  $C_{\text{Ni}} = 0.05\text{ M}$ .

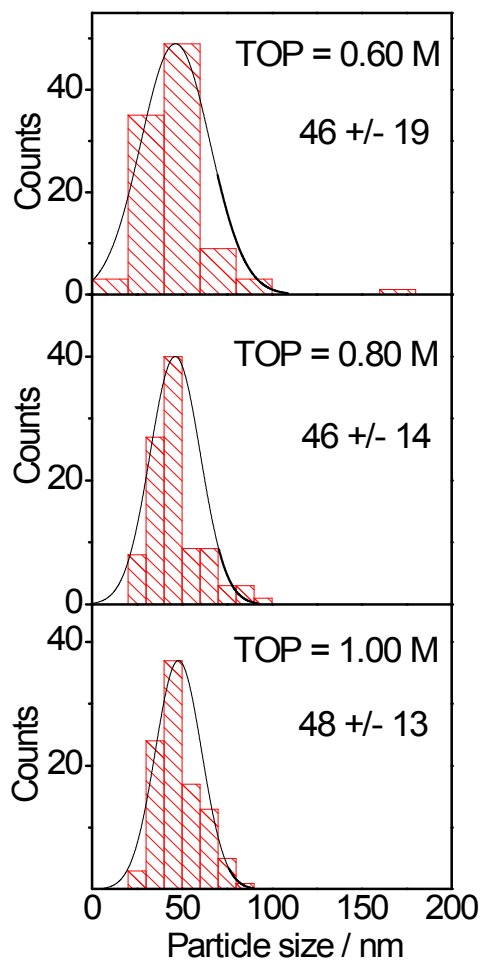

**Figure S5.** Particle size distributions of  $\text{Ni}_2\text{P}$  nanoparticles synthesized with TOP concentrations of 0.60, 0.80 and 1.00 M;  $T = 360\text{ }^\circ\text{C}$ ;  $L = 1.0\text{ mL/min}$ ;  $\tau = 170\text{ s}$ ;  $\text{P/Ni} = 16.0$ ;  $C_{\text{Ni}} = 0.05\text{ M}$ ;  $n = 100$ .

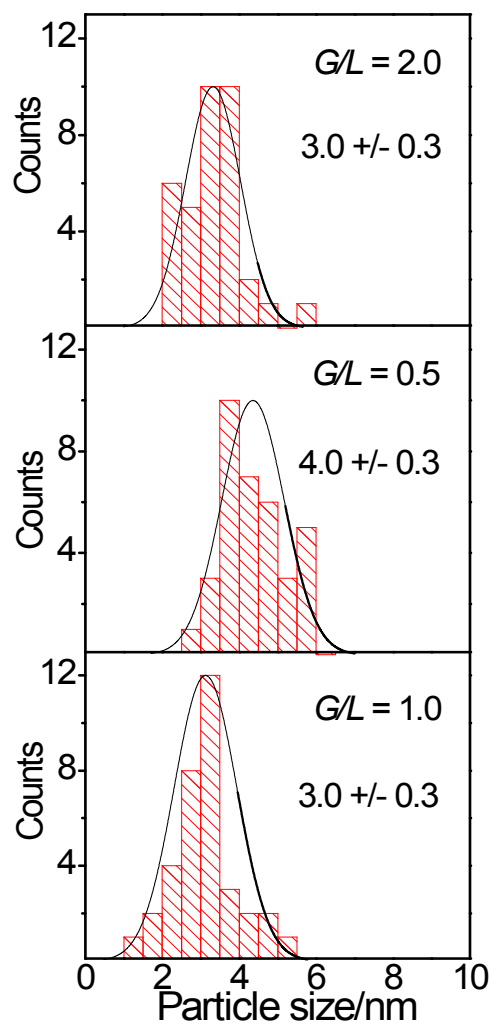

**Figure S6.** Particle size distributions of Ni<sub>2</sub>P nanoparticles synthesized in different gas and liquid flow rates;  $T = 360$  °C;  $C_{\text{Ni}} = 0.05$  M;  $C_{\text{TOP}} = 0.80$  M;  $C_{\text{1-oct}} = 1.70$  M;  $n = 50$ .

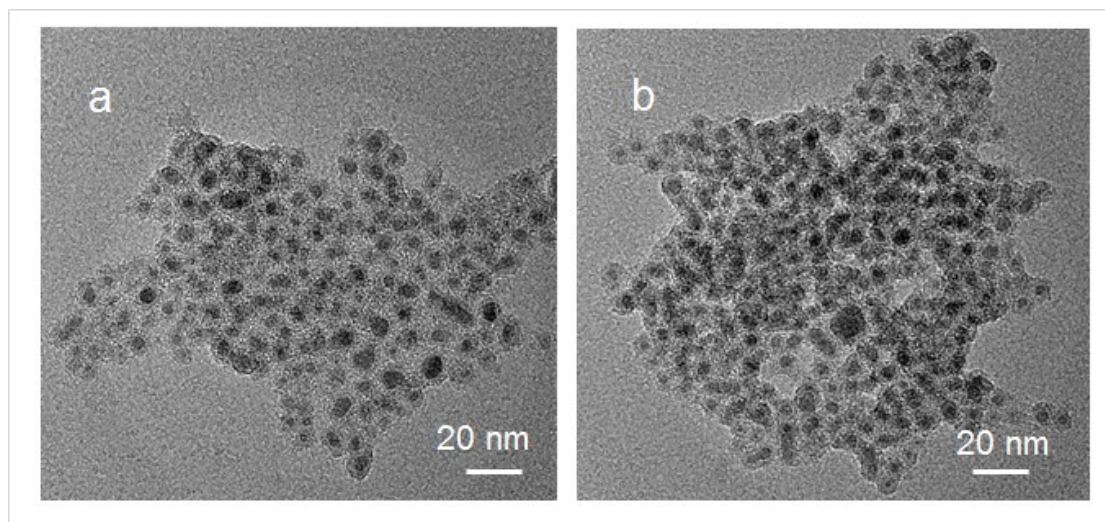

**Figure S7.** TEM micrographs of  $\text{Ni}_2\text{P}$  nanoparticles synthesized in  $G/L=0.5$ ;  $T = 360\text{ }^\circ\text{C}$ ;  $C_{\text{Ni}}=0.05\text{ M}$ ;  $C_{\text{TOP}} = 0.80\text{ M}$ ;  $C_{1\text{-oct}} = 1.70\text{ M}$ .

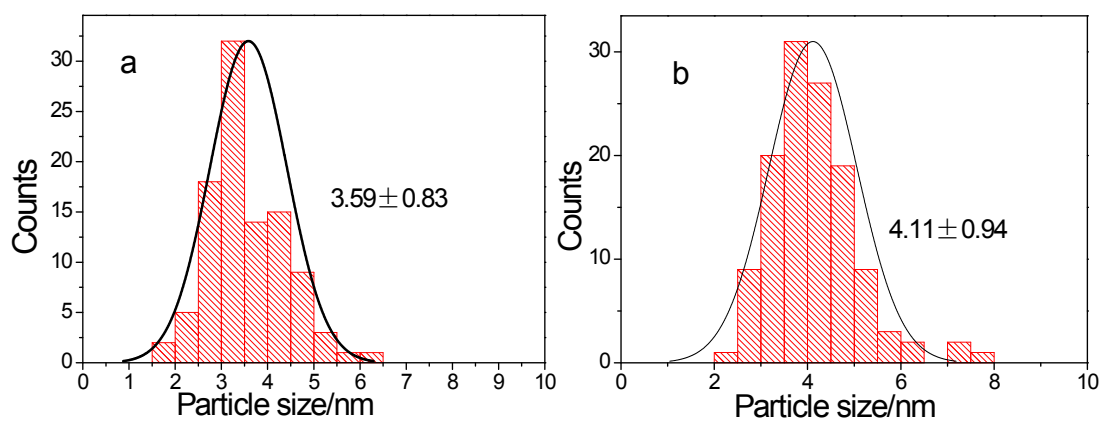

**Figure S8.** Particle size distributions of  $\text{Ni}_2\text{P}$  nanoparticles synthesized in  $G/L=0.5$ ;  $T = 360\text{ }^\circ\text{C}$ ;  $C_{\text{Ni}}=0.05\text{ M}$ ;  $C_{\text{TOP}} = 0.80\text{ M}$ ;  $C_{\text{1-oct}} = 1.70\text{ M}$ ;  $n = 50$ .
